# Supplementary material for: Polymerase/DNA interactions and enzymatic activity: multi-parameter analysis with electro-switchable biosurfaces
Source: PubMed Central journal article supplement (PMC4502528; doi:10.1038/srep12066), 2015-07-15
Supplement: srep12066-s1.pdf [file srep12066-s1.pdf]

# Polymerase/DNA interactions and enzymatic activity: multi-parameter analysis with electro-switchable biosurfaces

Andreas Langer<sup>1,2</sup>, Michael Schräml<sup>3,\*</sup>, Ralf Strasser<sup>1</sup>, Herwin Daub<sup>1,2</sup>, Thomas W. Myers<sup>4</sup>,  
Dieter Heindl<sup>3</sup>, Ulrich Rant<sup>1,\*</sup>

<sup>1</sup>Dynamic Biosensors GmbH, Lochhamer Str. 15, 82152 Martinsried, Germany

<sup>2</sup>Technische Universität München, 85748 Garching, Germany

<sup>3</sup>Roche Diagnostics GmbH, Nonnenwald 2, 82377 Penzberg, Germany

<sup>4</sup>Roche Molecular Systems Inc., 4300 Hacienda Dr Pleasanton, CA 94588, USA

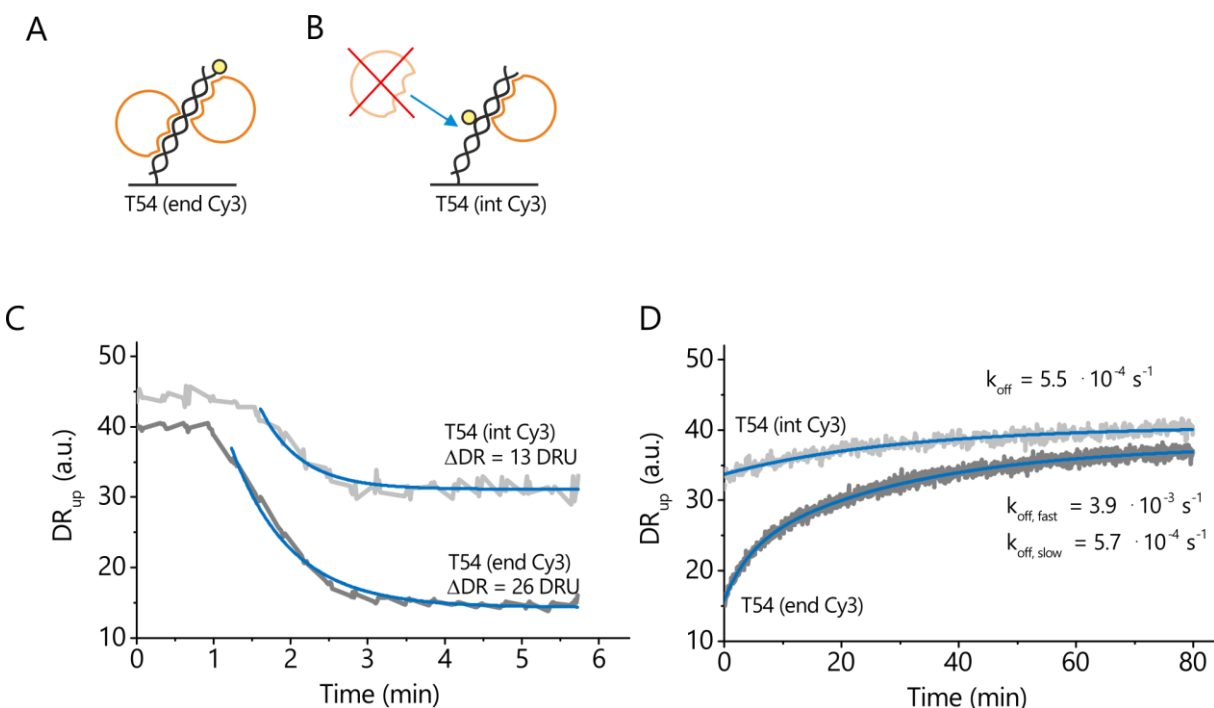

**Supplementary Figure S1 | Effect of the fluorophore position on polymerase binding.** *Taq* polymerase was bound to double-stranded 54mer DNA with varying positions of the Cy3 fluorophore: at the end (end Cy3, **panel A**) and internally (int Cy3, **panel B**). Absolute drops of the Dynamic Response in the association (**panel C**) and one respectively two time-constants in the dissociation (**panel D**) indicate binding of only one polymerase to the internally labeled DNA and two polymerases to the end-labeled DNA.

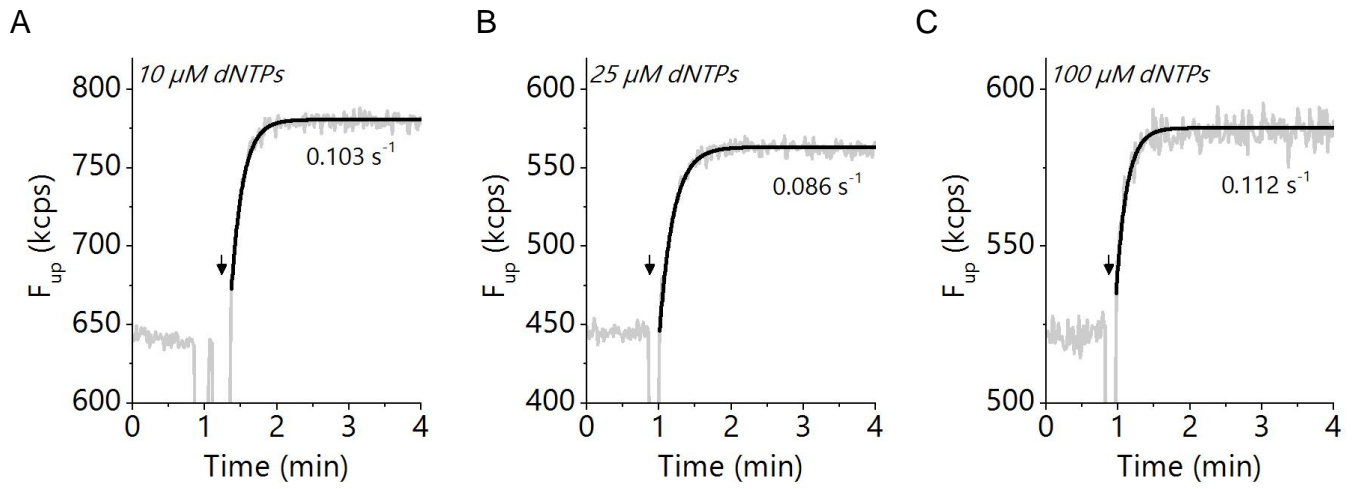

**Supplementary Figure S2 | Elongation activity as a function of dNTP concentration.** The elongation rate of *Taq* polymerase at 25°C was analyzed for dNTP concentrations of 10  $\mu$ M (A), 25  $\mu$ M (B) and 100  $\mu$ M (C).
